# Supplementary material for: Replicate Phylogenies and Post-Glacial Range Expansion of the Pitcher-Plant Mosquito, Wyeomyia smithii, in North America
Source: PLoS One. 2013 Sep 6;8(9):e72262. doi: 10.1371/journal.pone.0072262 (PMC3765167; doi:10.1371/journal.pone.0072262)
Supplement: Table S1 — Origin of populations. (XLSX) [file pone.0072262.s001.xlsx]

## Sheet: Sheet1
Table S1. Origin of populations
State/Prov	Acronym	N Lat	W Lon	m Elev	Data Set
AL1	LI	30.5	87.5	15	I
AL2	CI	31.2	88.3	150	II
FL1	CR	30.7	86.7	10	II
FL2	BC	30.7	86.7	10	II
FL3	WI	30.1	85	10	I
MA	FV	42.6	71.5	30	II
MB1	WB	53.9	101.3	305	I
MB2	EV	53	99.7	275	II
MB3	TB	54.2	101.1	280	II
MB4	FC	54	100.9	290	II
MD1	NP	38.3	75.5	20	I
MD2	LP	38.6	76.9	60	II
ME1	ME	45.7	68.7	60	I
ME2	KC	46.2	68.3	365	I
MS	GB	30.6	88.4	5	II
NCmtn 1	CB	35.1	82.6	840	I
NCmtn 2	SF	35.2	82.7	890	II
NCmtn 3	DB	35	83.1	900	I
NCmtn 4	HS	35	83.2	1190	I
NCmtn 5	HK	35	83.2	900	I
NC1	EW	35.3	79.5	150	II
NC2	CP	34.6	79.9	35	II
NC3	GS	34.1	78.3	20	I
NC4	WE	35.2	79.3	110	II
NC5	SH	35.1	79.8	107	I
NC6	PM	35.1	79.9	105	I
NJ1	PB	39.9	74.4	10	I
NJ2	HV	35	74.5	10	I
NJ3	MM	39.8	74.6	10	I
NJ4	BR	39.6	74.7	10	II
NJ5	PP	39.9	74.5	30	II
NL2	GM	49.6	57.9	55	II
NL1	NF	49.4	57.6	335	II
NS1	CM	46	60.2	65	II
NS2	NS	45.7	60.5	90	II
ON1	DR	46.2	77.6	155	I
ON2	DL	49.5	94.1	405	I
PA1	TH	41.2	75.4	595	I
PA2	TV	41	75.3	280	II
QC2	LB	46.2	74.5	380	II
QC1	SD	46.2	74.3	435	II
SK1	CL	54.2	113.5	580	II
SK2	BB	53.9	106	590	II
WI1	ML	46	89.6	500	I
WI2	RY	45.9	92	295	I
WI3	RC	42.5	89	525	II
Wy micthellii		Collecteed from bromeliads along the
Wy vanduzeei		Tamiami Trail, FL, 25°N, 80°W, 5m elev.
Data set I = Figs. 1-2, left; data set II = Figs. 1-2, right
The Acronym identifies each specific population used in previous studies from this lab.
